# Supplementary material for: The light-up fluorescence of AgNCs in a “DNA bulb”
Source: Royal Society of Chemistry journal article supplement (doi:10.1039/c8nr02575d), 2018-01-01
Supplement: c8nr02575d1.pdf [file c8nr02575d1.pdf]

## *Electronic Supplementary Information*

### **The light-up fluorescence of AgNCs in a “DNA bulb”**

*Yahui Guo,<sup>ab</sup> Fumiao Shen,<sup>a</sup> Yuliang Cheng,<sup>a</sup> Yunfei Xie,<sup>a</sup> Hang Yu,<sup>a</sup> Weirong Yao,<sup>a</sup> Hung-Wing Li,<sup>c</sup>  
He Qian<sup>\*a</sup> and Renjun Pei<sup>\*b</sup>*

<sup>a</sup> State Key Laboratory of Food Science and Technology, School of Food Science and Technology, Jiangnan University, Lihu Avenue, Wuxi 214122, China.

<sup>b</sup> CAS Key Laboratory of Nano-Bio Interface, Suzhou Institute of Nano-Tech and Nano-Bionics, Chinese Academy of Sciences, Ruoshui Road, Suzhou 215123, China.

<sup>c</sup> Department of Chemistry, Hong Kong Baptist University, Kowloon Tong, Hong Kong, China.

E-mail: H. Qian ([amtfl68168@126.com](mailto:amtfl68168@126.com)); R. Pei ([rjpei2011@sinano.ac.cn](mailto:rjpei2011@sinano.ac.cn))

**Table S1.** Names and sequences of the oligonucleotides used in this work.

| No. | Name<br>("filament"<br>ssDNA) | Sequence (5'-3')<br>("filament" is the central sequence with red color) |
|-----|-------------------------------|-------------------------------------------------------------------------|
| 1   | B-L                           | ATTACAGCTTGCTACACGAGAAGAGCCGCCATAGTA                                    |
| 2   | B-R                           | TATCACCAGGCAGTTGACAGTGTAGCAAGCTGTAAT                                    |
| 3   | B-F0                          | TCAACTGCCTGGTGATAAAACGACACTACGTGGGAATCTACTATGGCGGCTCTTC                 |
| 4   | B-F1 / C7(12)                 | TCAACTGCCTGGTGATAACCTTAATCCCCCTACTATGGCGGCTCTTC                         |
| 5   | B-F2 / C6(24)                 | TCAACTGCCTGGTGATATGACTAAATTAACCTTAATTACCTACTATGGCGGCTCTTC               |
| 6   | B-F3 / C8(24)                 | TCAACTGCCTGGTGATATGACTAAAAACCTTAATCCCCCTACTATGGCGGCTCTTC                |
| 7   | B-F4 / C13(24)                | TCAACTGCCTGGTGATAAGTACCCCAACCTGCCCTACCCTACTATGGCGGCTCTTC                |
| 8   | B-F5 / C14(24)                | TCAACTGCCTGGTGATAACCTTAATCCCCCCTTAATCCCCCTACTATGGCGGCTCTTC              |
| 9   | B-F6 / C16(24)                | TCAACTGCCTGGTGATACTCCTTCCTCCCTCCTCCTCCTCCTACTATGGCGGCTCTTC              |
| 10  | B-F7 / C19(24)                | TCAACTGCCTGGTGATACTCCTCCCCCCTTCCCCCTCCCTACTATGGCGGCTCTTC                |
| 11  | B-F8 / C21(24)                | TCAACTGCCTGGTGATACCCCCTCCCCCCTCCCCCTCCCTACTATGGCGGCTCTTC                |
| 12  | B-F9 / C24(24)                | TCAACTGCCTGGTGATACCCCCCCCCCCCCCCCCCCCCTACTATGGCGGCTCTTC                 |
| 13  | B-F10 / C8(8)                 | TCAACTGCCTGGTGATACCCCCCCCCTACTATGGCGGCTCTTC                             |
| 14  | B-F11 / C8(12)                | TCAACTGCCTGGTGATACTCCTTCCTCCTACTATGGCGGCTCTTC                           |
| 15  | B-F12 / C8(16)                | TCAACTGCCTGGTGATACTCCTTATCTACTCCTACTATGGCGGCTCTTC                       |
| 16  | B-F13 / C8(20)                | TCAACTGCCTGGTGATACTCCTTAATTCTTAACTCCTACTATGGCGGCTCTTC                   |
| 17  | B-F3 / C8(24)                 | TCAACTGCCTGGTGATATGACTAAAAACCTTAATCCCCCTACTATGGCGGCTCTTC                |
| 19  | B-L-AT                        | ATTACAGCTTGCTACACGAAAAACGTTATTATAATA                                    |
| 17  | B-R-AT                        | TATTATCGAATAATTAACAGTGTAGCAAGCTGTAAT                                    |
| 18  | BAT-F0                        | TTAATTATTCGATAATAAAACGACACTACGTGGGAATCTATTATAATAACGTTTT                 |
| 19  | B-L-GC                        | ATTACAGCTTGCTACACGAGGGGATCCGCCGCGGCG                                    |
| 20  | B-R-GC                        | CGCCGCATGGCGGCCGCGAGTGTAGCAAGCTGTAAT                                    |
| 21  | BGC-F0                        | CCGGCCGCCATGCGGCGAAACGACACTACGTGGGAATCCGCCGCGGCGGATCCCC                 |

**Table S2.** The reported DNA concentrations, buffer conditions and molar ratios (DNA template: [Ag<sup>+</sup>]) used for syntheses of AgNCs.

| DNA concentration | [DNA] : [Ag <sup>+</sup> ] | Buffer condition                                                 | Reference                                         |
|-------------------|----------------------------|------------------------------------------------------------------|---------------------------------------------------|
| 0.5 μM            | 1:10                       | phosphate buffer<br>(20 mM, pH 7.4)                              | <i>Nanoscale</i> , 2015, 7, 13224–13229.          |
| 1.0 μM            | 1:12                       | Tris buffer<br>(30 mM, pH 7.0)                                   | <i>Analyst</i> , 2017, 142, 1765–1771.            |
| 1.0 μM            | 1:6                        | phosphate buffer<br>(20 mM, pH 7.4)                              | <i>Chem. Sci.</i> , 2018, 9, 1774–1781.           |
| 1.5 μM            | 1:17                       | unknown                                                          | <i>Anal. Chem.</i> , 2011, 83, 6935–6939.         |
| 2.0 μM            | 1:12                       | citrate buffer<br>(20 mM, pH 7.0)                                | <i>Small</i> , 2015, 11, 1385–1389.               |
| 2.5 μM            | 1:6                        | phosphate buffer saline<br>(20 mM, pH 7.0)                       | <i>Talanta</i> , 2018, 181, 24-31.                |
| 3.0 μM            | 1:6                        | phosphate buffer<br>(20 mM, pH 6.6)                              | <i>Chem. Commun.</i> , 2012, 48, 5488–5490.       |
| 5.0 μM            | 1:8                        | phosphate buffer<br>(20 mM, pH 7.4)                              | <i>Biosens. Bioelectron.</i> , 2016, 79, 411–415. |
| 10 μM             | 1:6                        | phosphate buffer<br>(5 mM, pH 7.5)                               | <i>J. Am. Chem. Soc.</i> , 2004, 126, 5207–5212.  |
| 15 μM             | 1:16                       | formate/cacodylate/phosphate/borate<br>buffer<br>(10 mM, pH 6-9) | <i>J. Phys. Chem. C</i> , 2009, 113, 19518–19524. |
| 15 μM             | 1:6                        | phosphate buffer<br>(20 mM, pH 6.6)                              | <i>Nano Lett.</i> , 2010, 10, 3106–3110.          |
| 15 μM             | 1:6                        | phosphate buffer<br>(20 mM, pH 6.6)                              | <i>Chem. Commun.</i> , 2010, 46, 3280–3282.       |
| 25 μM             | 1:6                        | ammonium acetate buffer<br>(40 mM, pH 7.0)                       | <i>J. Phys. Chem. C</i> , 2009, 113, 4229–4233.   |
| 25 μM             | 1:9                        | phosphate buffer<br>(200 mM, pH7.0)                              | <i>Chem. Commun.</i> , 2018, 54, 1089–1092.       |
| 30 μM             | 1:6                        | ammonium acetate buffer<br>(40 mM, pH 7.0)                       | <i>Chem. Commun.</i> , 2009, 23, 3395–3397.       |
| 50 μM             | 1:6                        | phosphate/citrate/ammonium buffer<br>(20 mM, pH 5-8)             | <i>J. Am. Chem. Soc.</i> , 2008, 130, 5038–5039.  |
| 50 μM             | 1:6                        | phosphate buffer<br>(20 mM, pH 7.4, 100 mM KCl)                  | <i>Talanta</i> , 2012, 88, 450–455.               |
| 50 μM             | 1:6                        | phosphate buffer<br>(20 mM, pH 7.0)                              | <i>Anal. Chem.</i> , 2018, 90, 1098–1103.         |
| 60 μM             | 1:6                        | 18-MΩ water<br>(pH 7.0)                                          | <i>PNAS</i> , 2007, 104, 12616–12621.             |
| 10 mM             | 1:6                        | phosphate-buffered saline<br>(10 mM, pH=7.4)                     | <i>Chem. Commun.</i> , 2015, 51, 11810–11813.     |

**Table S3.** The fluorescence intensities of B-F<sub>x</sub>-AgNCs (AgNCs synthesized with “filament” ssDNA) and B<sub>x</sub>-AgNCs (AgNCs synthesized with complete “DNA bulb”) at the maximum emission wavelengths, and the enhancing index (FI<sub>1</sub>/FI<sub>0</sub>).

| “filament”-AgNCs | FL Intensity (FI <sub>0</sub> ) | “bulb”-AgNCs | FL Intensity (FI <sub>1</sub> ) | Maximum Emission Wavelength | Enhancing Index (FI <sub>1</sub> /FI <sub>0</sub> ) |
|------------------|---------------------------------|--------------|---------------------------------|-----------------------------|-----------------------------------------------------|
| B-F0-AgNCs       | 693.791                         | B0-AgNCs     | 15403.637                       | 530 nm                      | 22.2                                                |
| B-F1-AgNCs       | 1123.7                          | B1-AgNCs     | 3232.7                          | 527 nm                      | 2.9                                                 |
| B-F2-AgNCs       | 1024.475                        | B2-AgNCs     | 2328.129                        | 548 nm                      | 2.3                                                 |
| B-F3-AgNCs       | 1500.606                        | B3-AgNCs     | 2952.635                        | 549 nm                      | 2.0                                                 |
| B-F4-AgNCs       | 680.9                           | B4-AgNCs     | 29724.1                         | 645 nm                      | 43.7                                                |
| B-F5-AgNCs       | 756.2                           | B5-AgNCs     | 14622.8                         | 576 nm                      | 19.3                                                |
| B-F6-AgNCs       | 4957.6                          | B6-AgNCs     | 30768.6                         | 652 nm                      | 6.2                                                 |
| B-F7-AgNCs       | 28932.271                       | B7-AgNCs     | 40087.793                       | 707 nm                      | 1.4                                                 |
| B-F8-AgNCs       | 24178.684                       | B8-AgNCs     | 30599.3                         | 682 nm                      | 1.3                                                 |
| B-F9-AgNCs       | 321.9                           | B9-AgNCs     | 56393.5                         | 546 nm                      | 175.2                                               |
| B-F10-AgNCs      | 9128.038                        | B10-AgNCs    | 18030.635                       | 729 nm                      | 2.0                                                 |
| B-F11-AgNCs      | 863.708                         | B11-AgNCs    | 3126.047                        | 638 nm                      | 3.6                                                 |
| B-F12-AgNCs      | 818.671                         | B12-AgNCs    | 2478.688                        | 628 nm                      | 3.0                                                 |
| B-F13-AgNCs      | 897.763                         | B13-AgNCs    | 2227.973                        | 623 nm                      | 2.5                                                 |
| BAT-F0-AgNCs     | 335.66                          | BAT-AgNCs    | 10231.159                       | 530 nm                      | 30.5                                                |
| BGC-F0-AgNCs     | 7165.037                        | BGC-AgNCs    | 21239.309                       | 651 nm                      | 3.0                                                 |

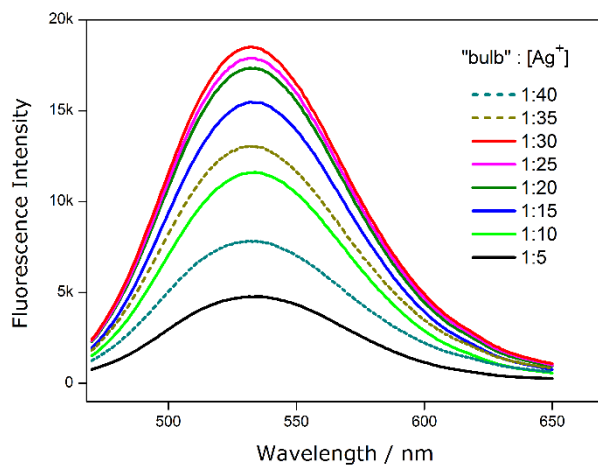

**Figure S1.** Fluorescence spectrum of B0-AgNCs as a function of [DNA bulb]:[Ag<sup>+</sup>] ratio. The decreases when using 1:35 and 1:40 were supposed to be formation of larger nonluminous silver particles.

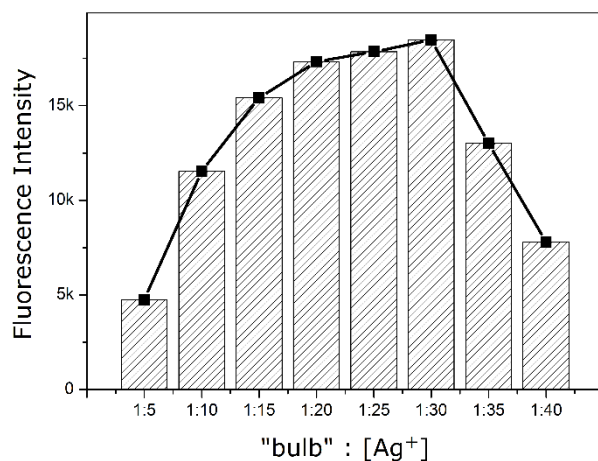

**Figure S2.** Fluorescence intensity at 530 nm of B0-AgNCs as a function of [DNA bulb]:[Ag<sup>+</sup>] ratio.

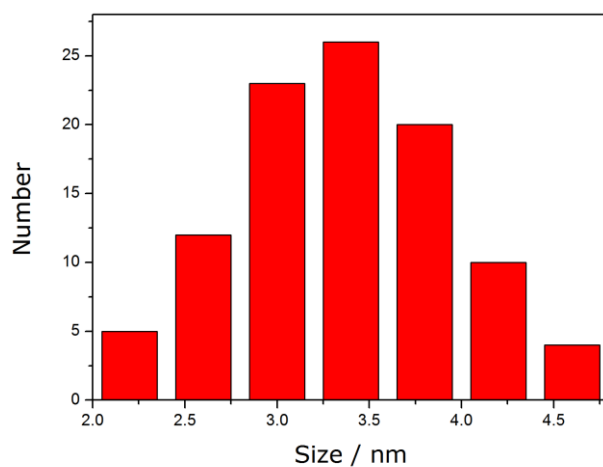

**Figure S3.** Statistical analysis of B0-AgNCs size by measuring 100 particles using the ImageJ software.

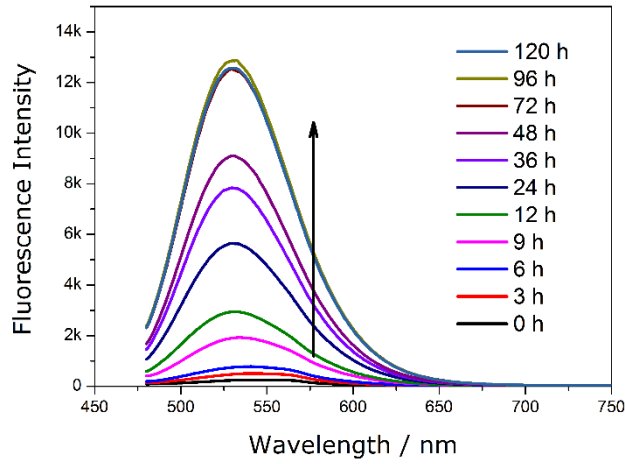

**Figure S4.** The time-dependent fluorescence spectra during the formation of B0-AgNCs. The samples were placed in a dark place at room temperature during each measurement interval.

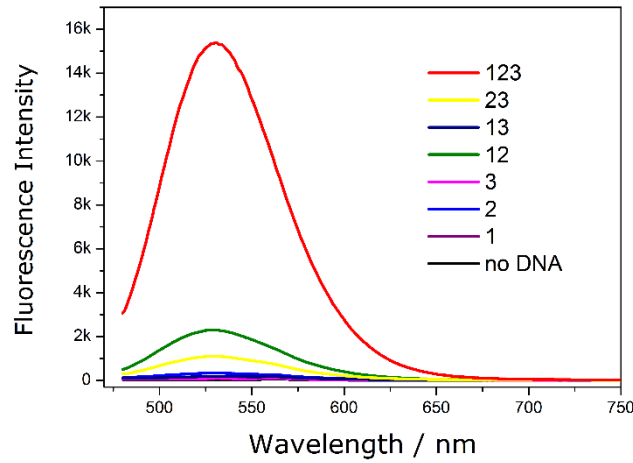

**Figure S5.** Fluorescent spectra of synthesized AgNCs capped with different ssDNA combinations. 1: B-L, 2: B-R, 3: B-F0 (Table S1).

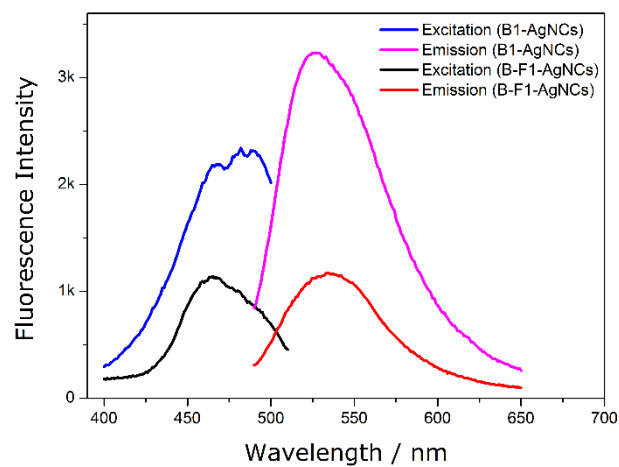

**Figure S6.** Excitation and emission spectra of B-F1-AgNCs and B1-AgNCs, respectively. B1 represented “bulb” 1, which was assembled by B-L&B-R&B-F1.

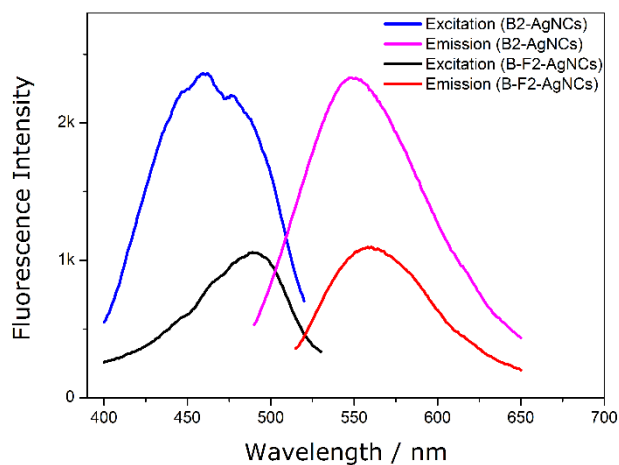

**Figure S7.** Excitation and emission spectra of B-F2-AgNCs and B2-AgNCs, respectively. B2 represented “bulb” 2, which was assembled by B-L&B-R&B-F2.

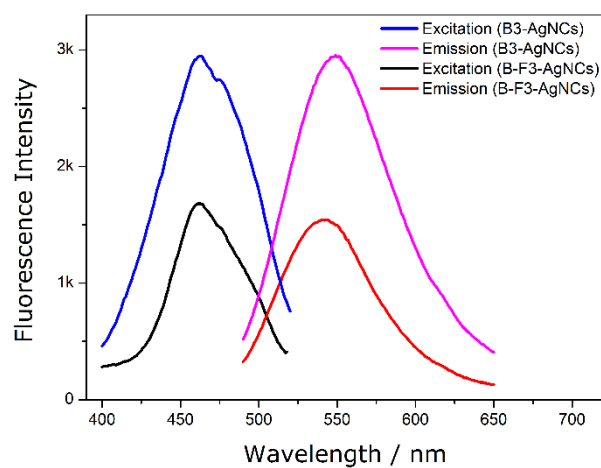

**Figure S8.** Excitation and emission spectra of B-F3-AgNCs and B3-AgNCs, respectively.

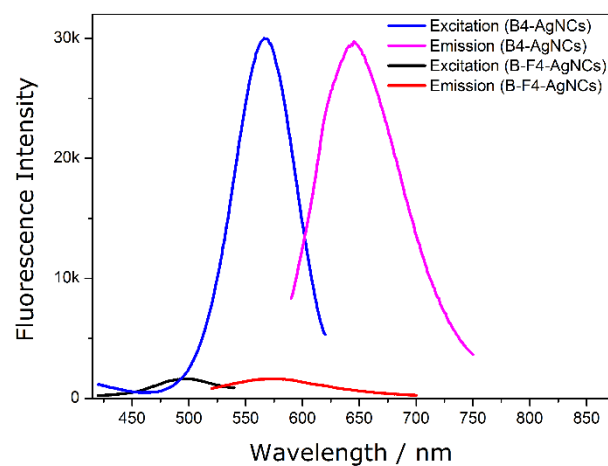

**Figure S9.** Excitation and emission spectra of B-F4-AgNCs and B4-AgNCs, respectively.

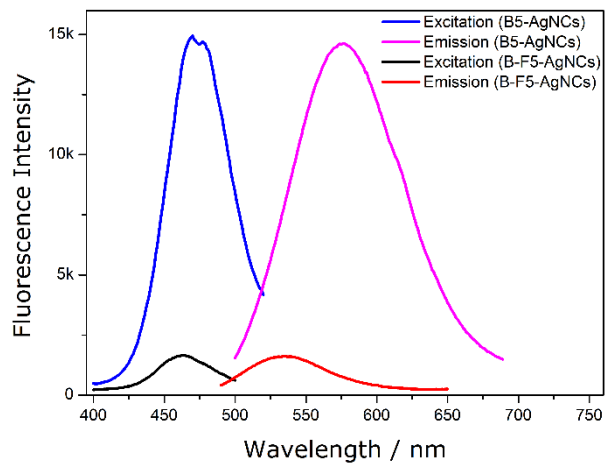

**Figure S10.** Excitation and emission spectra of B-F5-AgNCs and B5-AgNCs, respectively.

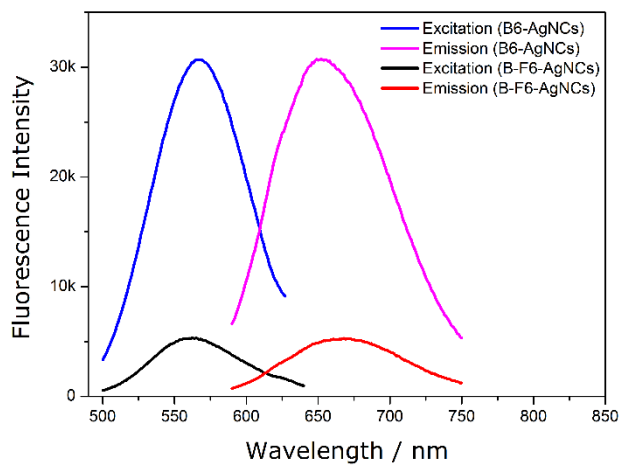

**Figure S11.** Excitation and emission spectra of B-F6-AgNCs and B6-AgNCs, respectively.

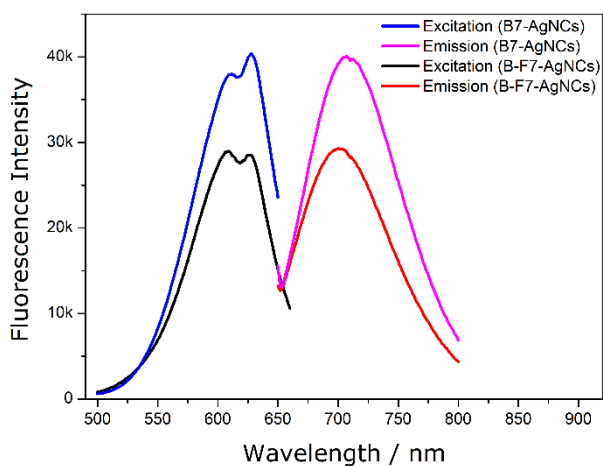

**Figure S12.** Excitation and emission spectra of B-F7-AgNCs and B7-AgNCs, respectively.



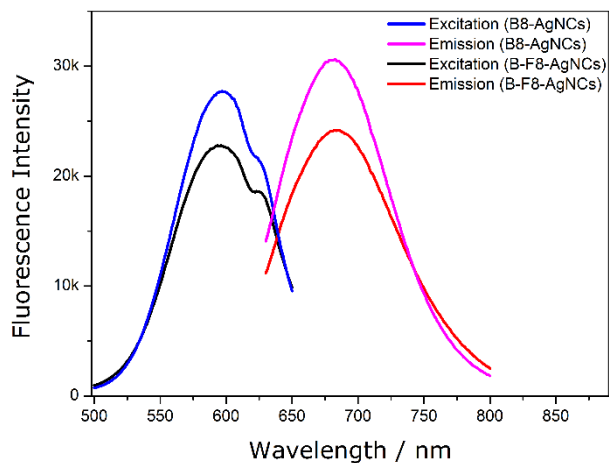

**Figure S13.** Excitation and emission spectra of B-F8-AgNCs and B8-AgNCs, respectively.

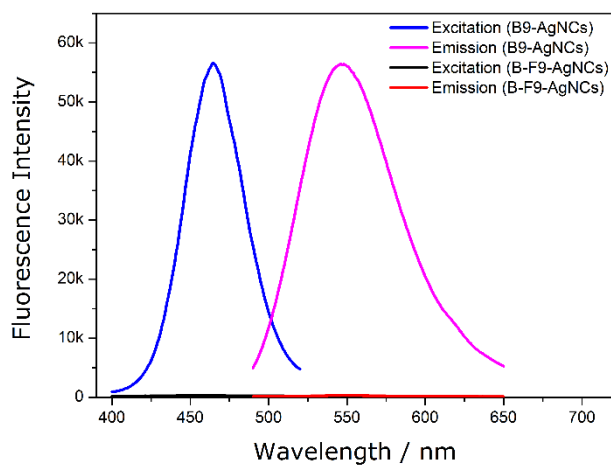

**Figure S14.** Excitation and emission spectra of B-F9-AgNCs and B9-AgNCs, respectively.

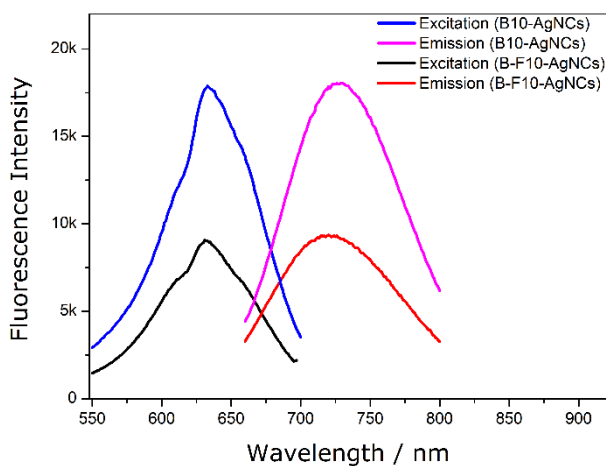

**Figure S15.** Excitation and emission spectra of B-F10-AgNCs and B10-AgNCs, respectively.

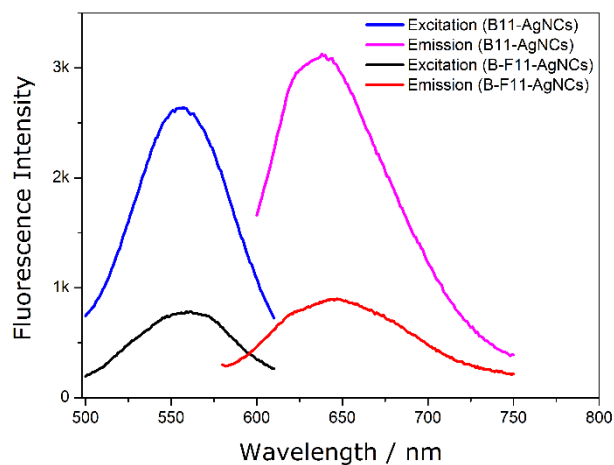

**Figure S16.** Excitation and emission spectra of B-F11-AgNCs and B11-AgNCs, respectively.

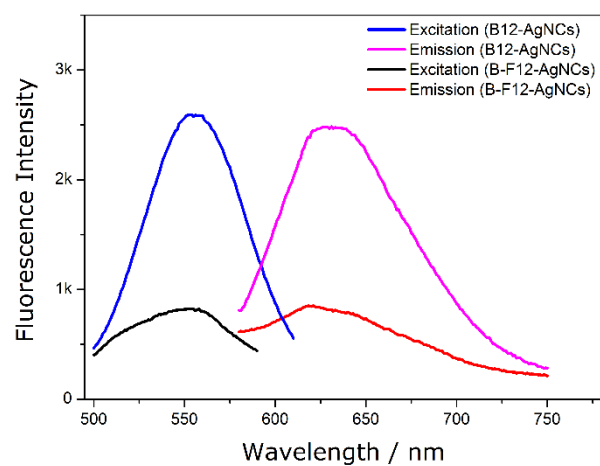

**Figure S17.** Excitation and emission spectra of B-F12-AgNCs and B12-AgNCs, respectively.

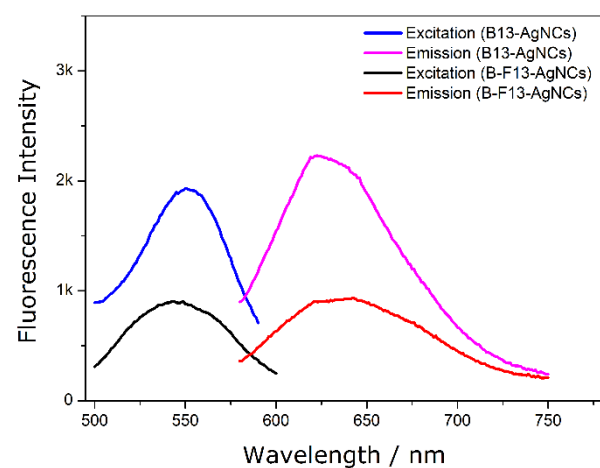

**Figure S18.** Excitation and emission spectra of B-F13-AgNCs and B13-AgNCs, respectively.

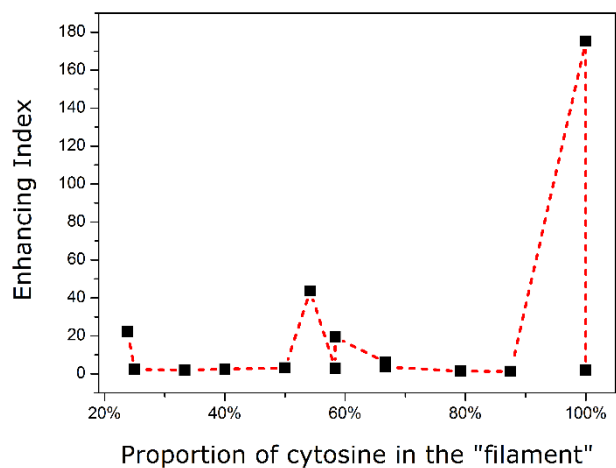

**Figure S19.** The correlation between enhancing index and proportion of cytosine in the “filament”.

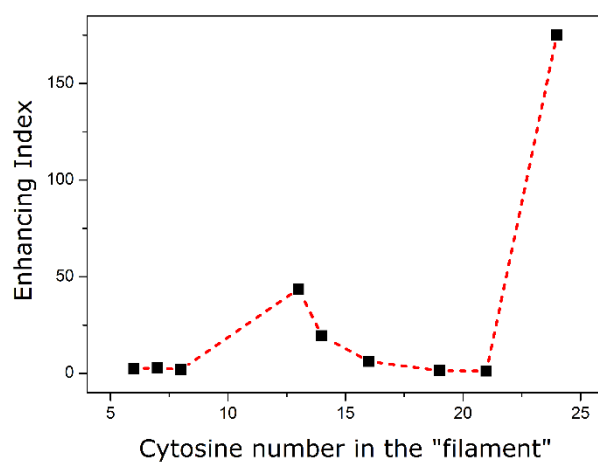

**Figure S20.** The relationship between enhancing index and the number of cytosine bases in the “filament”.

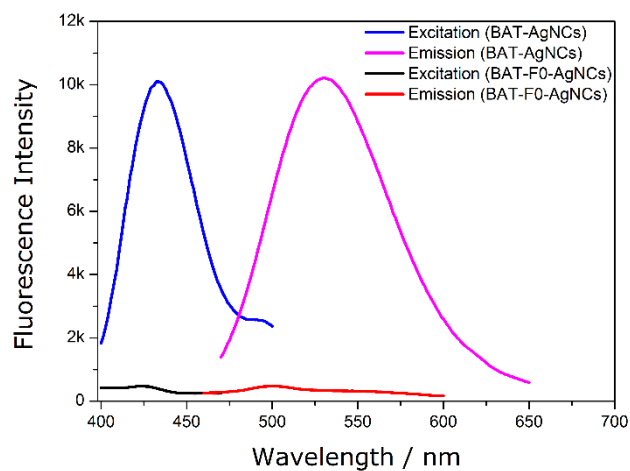

**Figure S21.** Excitation and emission spectra of BAT-F0-AgNCs and BAT-AgNCs, respectively.

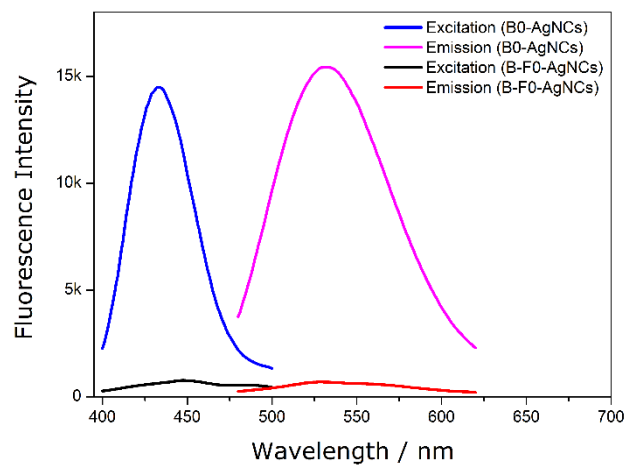

**Figure S22.** Excitation and emission spectra of B-F0-AgNCs and B0-AgNCs, respectively.

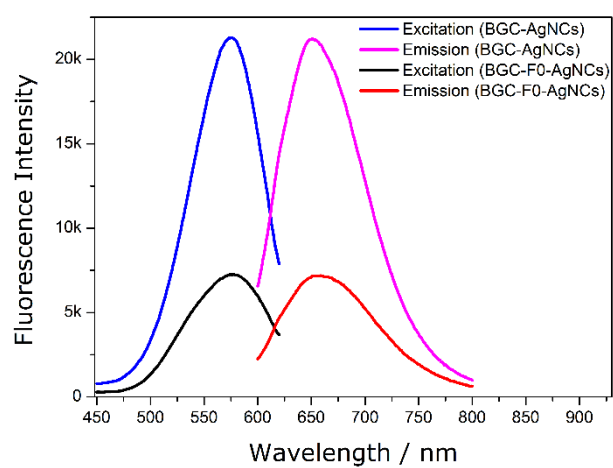

**Figure S23** Excitation and emission spectra of BGC-F0-AgNCs and BGC-AgNCs, respectively.

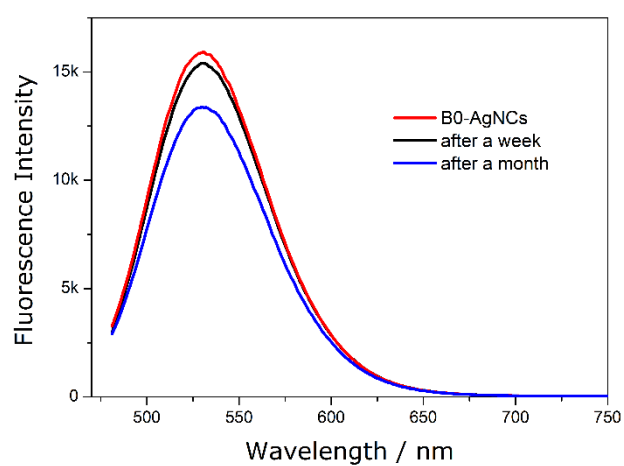

**Figure S24.** Fluorescence spectra of B0-AgNCs recorded at set intervals (stored at room temperature in darkness).

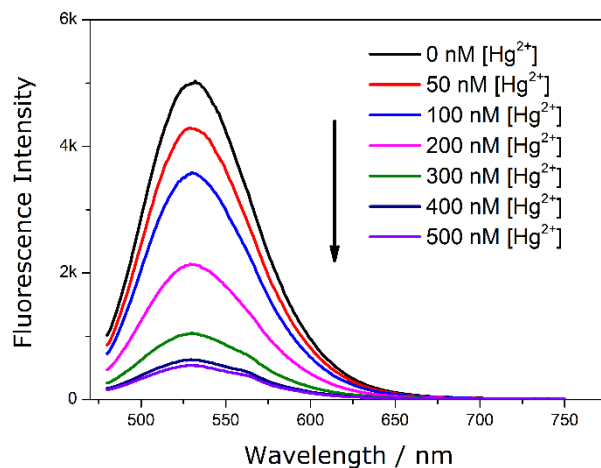

**Figure S25.** Emission spectra of B0-AgNCs in the presence of different concentration of  $\text{Hg}^{2+}$ .

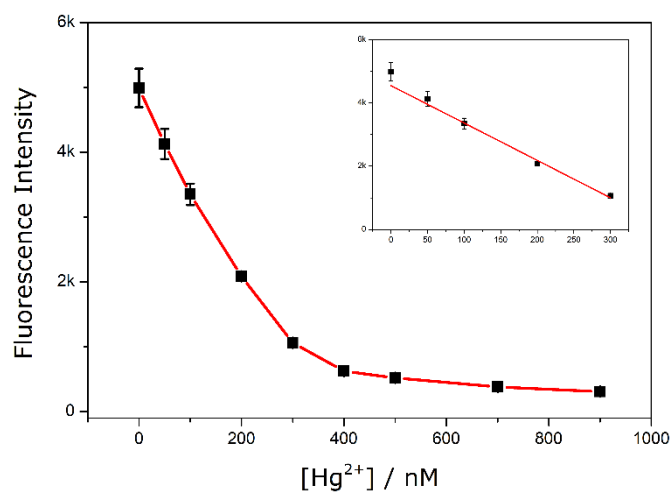

**Figure S26.** Fluorescence intensity changes of B0-AgNCs as a function of the concentration of  $\text{Hg}^{2+}$ . The inset is a linear relationship between the change of fluorescence intensity and concentration of  $\text{Hg}^{2+}$  (0–300 nM).

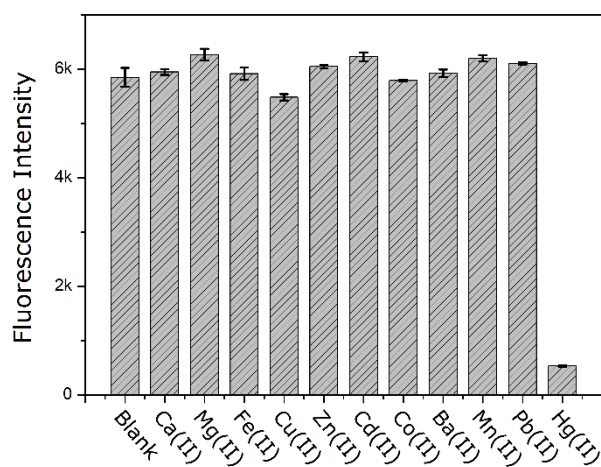

**Figure 27.** Fluorescence intensity at  $\lambda_{em}=530$  nm of aqueous B0-AgNCs solutions in the presence of different metal ions (5  $\mu\text{M}$  except  $\text{Hg}^{2+}$  500 nM).
